# Supplementary material for: Does ADHD Symptomatology Influence Treatment Outcome and Dropout Risk in Eating Disorders? A longitudinal Study
Source: PubMed Central journal article supplement (PMC7408799; doi:10.3390/jcm9072305), 2020-07-20
Supplement: jcm-09-02305-s001.pdf [file jcm-09-02305-s001.pdf]

**Table S1.** Description of ADHD measures within the groups defined by the short-term therapy outcome (n=136).

| ADHD screening (+); n - %  |                                         |       |                                        |       |          |
|----------------------------|-----------------------------------------|-------|----------------------------------------|-------|----------|
| Risk for dropout           | <i>Completers</i><br>(n=72)             |       | <i>Dropout</i><br>(n=64)               |       | <i>p</i> |
| Anorexia (n=31)            | 1                                       | 5.0%  | 2                                      | 18.2% | .235     |
| Bulimia (n=59)             | 17                                      | 51.5% | 12                                     | 46.2% | .683     |
| OSFED (n=26)               | 4                                       | 50.0% | 5                                      | 27.8% | .272     |
| BED (n=20)                 | 3                                       | 27.3% | 2                                      | 22.2% | .795     |
| Short term therapy outcome | <i>Full/partial remission</i><br>(n=56) |       | <i>Dropout/non-remission</i><br>(n=80) |       | <i>p</i> |
| Anorexia (n=31)            | 1                                       | 6.7%  | 2                                      | 12.5% | .583     |
| Bulimia (n=59)             | 15                                      | 57.7% | 14                                     | 42.4% | .244     |
| OSFED (n=26)               | 2                                       | 50.0% | 7                                      | 31.8% | .482     |
| BED (n=20)                 | 3                                       | 27.3% | 2                                      | 22.2% | .795     |

*Note.* OSFED: other specified feeding eating disorder. BED: binge eating disorder

**Table S2.** Description of ADHD measures within the groups defined by the short term therapy outcomes (n=136) and the follow-up (n=123).

|                             | Treatment outcome               |       |                              |       |      | Short-term therapy outcome        |       |                                   |       |      | Outcome at follow-up |       |                       |       |      |
|-----------------------------|---------------------------------|-------|------------------------------|-------|------|-----------------------------------|-------|-----------------------------------|-------|------|----------------------|-------|-----------------------|-------|------|
|                             | Completers<br>treatment<br>n=72 |       | Dropout<br>treatment<br>n=64 |       | p    | Full/partial<br>remission<br>n=56 |       | Dropout/non-<br>remission<br>n=80 |       | p    | Remission<br>n=87    |       | Non-remission<br>n=36 |       | p    |
| Mean                        | SD                              | Mean  | SD                           | Mean  |      | SD                                | Mean  | SD                                | Mean  |      | SD                   | Mean  | SD                    | Mean  |      |
| ASRS: inattention           | 6.85                            | 3.57  | 7.06                         | 2.73  | .696 | 7.21                              | 3.46  | 6.76                              | 3.00  | .419 | 7.07                 | 3.36  | 6.42                  | 3.08  | .318 |
| ASRS: hyperactive           | 4.49                            | 2.08  | 4.80                         | 1.63  | .337 | 4.54                              | 2.12  | 4.70                              | 1.69  | .617 | 4.55                 | 1.90  | 4.97                  | 1.83  | .262 |
| ASRS: total                 | 11.33                           | 4.40  | 11.89                        | 3.44  | .416 | 11.75                             | 4.19  | 11.49                             | 3.84  | .706 | 11.62                | 4.22  | 11.44                 | 3.64  | .827 |
| EDI-2: Drive.thinness       | 13.88                           | 6.14  | 14.30                        | 5.69  | .678 | 13.54                             | 6.33  | 14.46                             | 5.62  | .376 | 13.67                | 5.80  | 14.81                 | 6.10  | .331 |
| EDI-2: Body.dissatisf.      | 16.19                           | 8.87  | 17.89                        | 7.96  | .248 | 16.36                             | 9.07  | 17.43                             | 8.04  | .470 | 16.61                | 8.71  | 17.44                 | 7.66  | .618 |
| EDI-2: Interoc.awar.        | 10.11                           | 6.96  | 11.70                        | 6.82  | .185 | 10.25                             | 6.99  | 11.28                             | 6.88  | .397 | 10.14                | 6.70  | 12.33                 | 7.46  | .112 |
| EDI-2: Bulimia              | 6.21                            | 4.99  | 7.10                         | 5.37  | .322 | 6.30                              | 4.86  | 6.85                              | 5.40  | .549 | 6.67                 | 5.31  | 6.89                  | 4.94  | .830 |
| EDI-2:                      | 5.06                            | 4.41  | 5.48                         | 4.17  | .571 | 5.20                              | 4.60  | 5.29                              | 4.07  | .900 | 5.16                 | 4.19  | 5.39                  | 4.47  | .788 |
| Interper.distrust           |                                 |       |                              |       |      |                                   |       |                                   |       |      |                      |       |                       |       |      |
| EDI-2: Ineffectiveness      | 9.56                            | 7.16  | 11.49                        | 7.50  | .127 | 9.75                              | 7.25  | 10.96                             | 7.43  | .347 | 10.14                | 7.65  | 11.03                 | 7.08  | .550 |
| EDI-2: Maturity fears       | 7.22                            | 5.36  | 7.98                         | 6.07  | .440 | 7.43                              | 5.55  | 7.68                              | 5.82  | .799 | 7.55                 | 5.91  | 7.50                  | 5.36  | .964 |
| EDI-2: Perfectionism        | 5.18                            | 4.35  | 6.10                         | 3.88  | .203 | 4.64                              | 4.23  | 6.29                              | 3.98  | .052 | 5.24                 | 3.93  | 6.08                  | 4.67  | .309 |
| EDI-2:                      | 5.17                            | 5.54  | 6.87                         | 6.00  | .088 | 5.29                              | 5.70  | 6.44                              | 5.86  | .255 | 5.17                 | 5.37  | 7.42                  | 6.57  | .051 |
| Impulse.regulat.            |                                 |       |                              |       |      |                                   |       |                                   |       |      |                      |       |                       |       |      |
| EDI-2: Ascetic              | 6.74                            | 4.14  | 7.22                         | 4.23  | .501 | 6.64                              | 4.19  | 7.19                              | 4.17  | .455 | 6.51                 | 3.97  | 7.78                  | 4.30  | .117 |
| EDI-2: Social<br>insecurity | 7.22                            | 5.07  | 7.90                         | 5.10  | .438 | 7.32                              | 5.24  | 7.70                              | 4.99  | .674 | 7.48                 | 5.04  | 7.28                  | 5.54  | .842 |
| EDI-2: Total score          | 92.53                           | 45.03 | 103.97                       | 43.49 | .135 | 92.71                             | 46.87 | 101.55                            | 42.71 | .256 | 94.33                | 44.96 | 103.94                | 44.95 | .283 |

Note. SD=standard deviation.
